# Supplementary material
Source: PubMed Central journal article supplement (PMC3703845)
Supplement: NIHMS479528-supplement-Supplementary_results.pdf [file NIHMS479528-supplement-Supplementary_results.pdf]

## ***Supplemental Information***

### **Laserspray Ionization Imaging of Multiply Charged Ions using a Commercial Vacuum MALDI Ion Source**

Ellen D. Inutan<sup>1</sup>, James Wager-Miller<sup>2</sup>, Ken Mackie<sup>2</sup>, Sarah Trimpin<sup>1\*</sup>

<sup>1</sup>*Department of Chemistry, Wayne State University, Detroit, MI 48202 USA*

<sup>2</sup>*Gill Center for Biomolecular Science, Indiana University, Bloomington, IN 47405*

*USA*

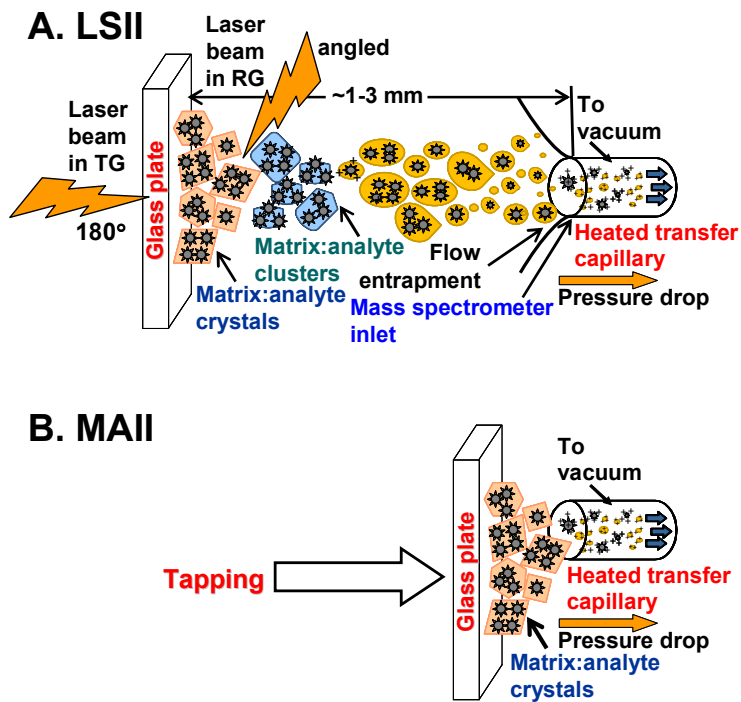

**Scheme S1.** Cluster model representation at atmospheric pressure of **(A)** LSII in transmission geometry and reflection geometry laser ablation and **(B)** MAII with no laser of the matrix/analyte crystals forming charged matrix/analyte clusters. Multiply charged ions are produced in the presence of a pressure drop region from atmospheric pressure to vacuum and desolvation of the matrix from the clusters in the heated transfer capillary.

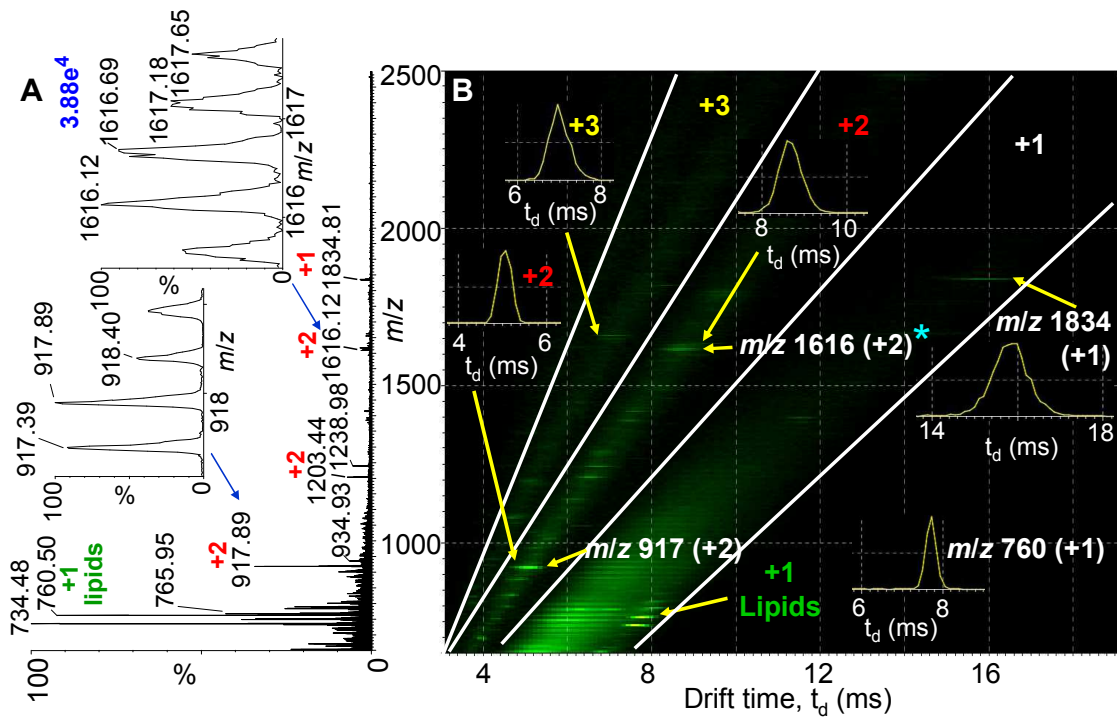

**Figure S1.** LSI-IMS-MS **(A)** total mass spectrum and **(B)** two-dimensional plot of drift time vs.  $m/z$  of delipified mouse brain tissue spotted with 2,5-DHAP matrix and acquired using 'LSI settings'<sup>39,42</sup> on a commercial intermediate pressure MALDI source of the SYNAPT G2 mass spectrometer. Insets show **(A)** isotopic distribution of +2 ions of the identified *N*-acetylated MBP peptide ( $m/z$  917.39) and the highest MW detected, ~3.2 kDa ( $m/z$  1616.12) (see \*), and **(B)** drift times of +3, +2, and +1 ions.

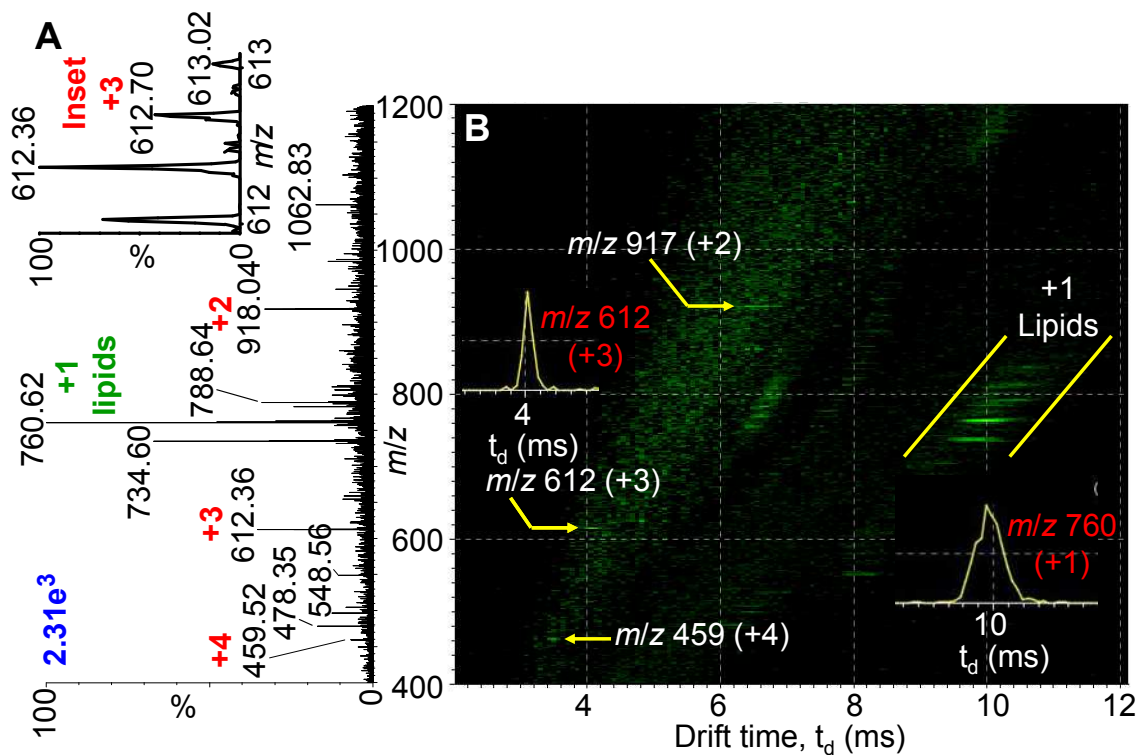

**Figure S2.** LSII-IMS-MS **(A)** total mass spectrum and **(B)** two-dimensional plot of drift time vs.  $m/z$  of non delipidated mouse brain tissue spotted with 2,5-DHAP matrix and acquired using the nanoESI source of the SYNAPT G2 mass spectrometer with a homebuilt skimmer cone to perform LSII in transmission geometry. Insets show in **(A)** isotopic distribution and **(B)** drift times of +3 charge state ion ( $m/z$  612.36) of the identified *N*-acetylated MBP peptide and +1 drift time of a lipid ( $m/z$  760.62).

**I. 2-NPG**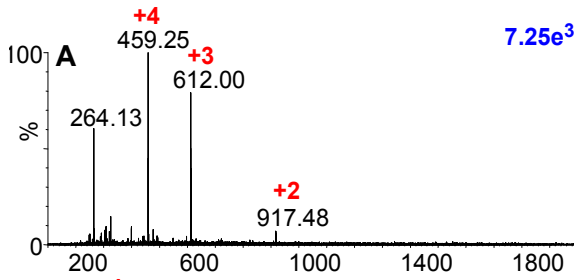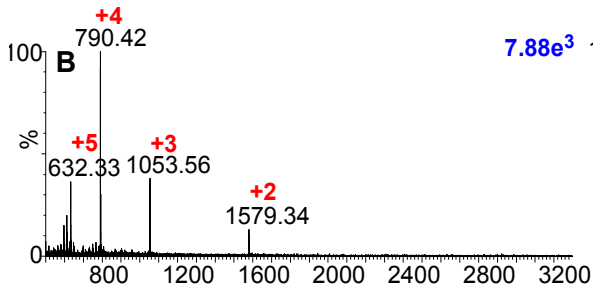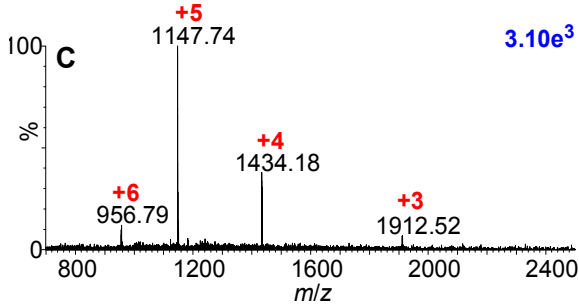**II. 2,5-DHAP**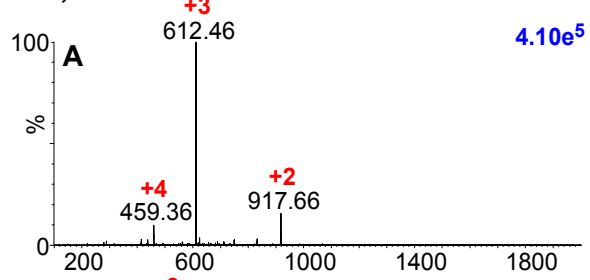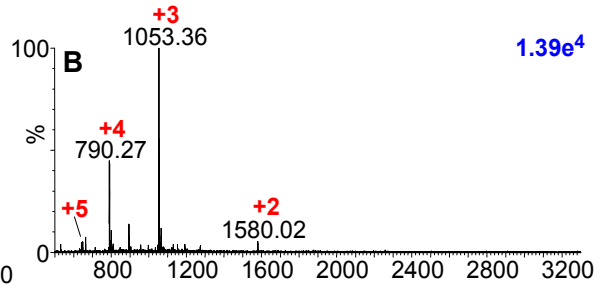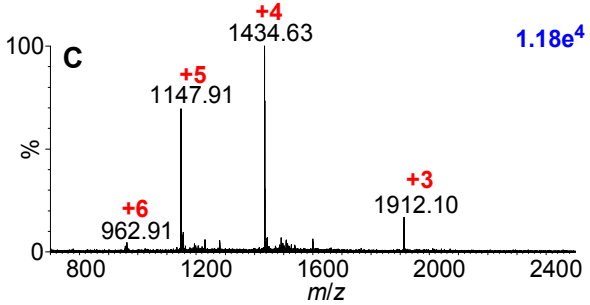

**Figure S3.** LSIV-MS using (I) 2-NPG matrix at low laser power ( $4.2 \text{ J cm}^{-2}$ ) and (II) 2,5-DHAP matrix at higher laser power ( $7.3 \text{ J cm}^{-2}$ ) of (A) *N*-acetylated MBP peptide (MW 1833 Da), (B) galanin (MW 3150 Da), and (C) bovine insulin (MW 5731 Da) acquired using 'LSI settings'<sup>39,42</sup> on a commercial intermediate pressure MALDI source of the SYNAPT G2 mass spectrometer.

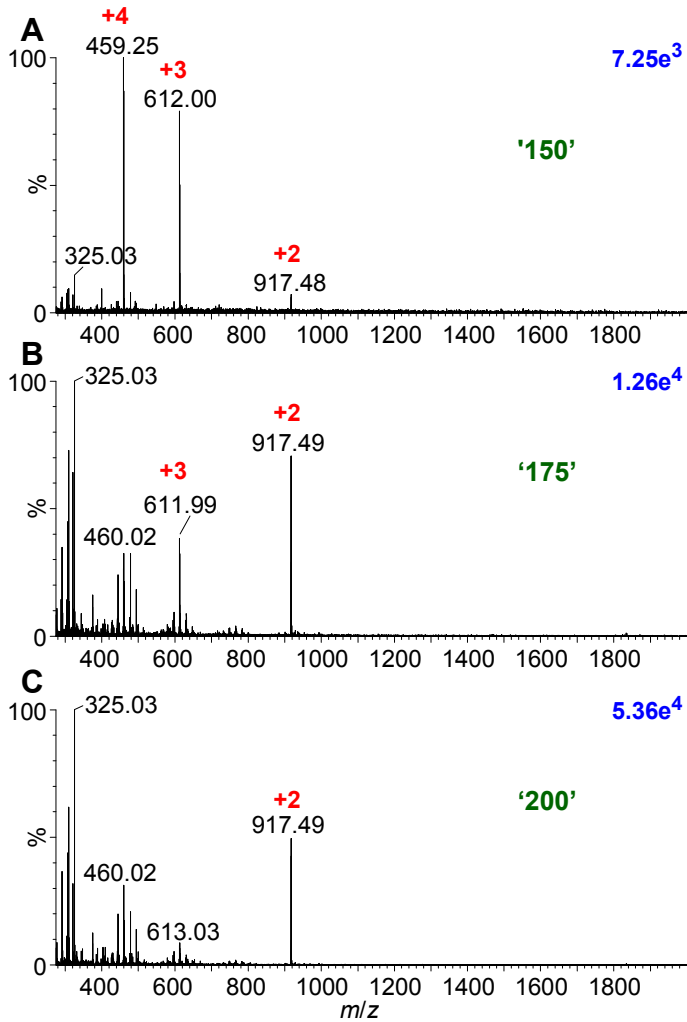

**Figure S4.** LSIV-MS of *N*-acetylated MBP peptide (MW 1833 Da) with 2-NPG matrix using different laser power: (A) 4.2, (B) 5.7, and (C) 7.3 J cm<sup>-2</sup> acquired using 'LSI settings'<sup>39,42</sup> on a commercial intermediate pressure MALDI source of the SYNAPT G2 mass spectrometer.

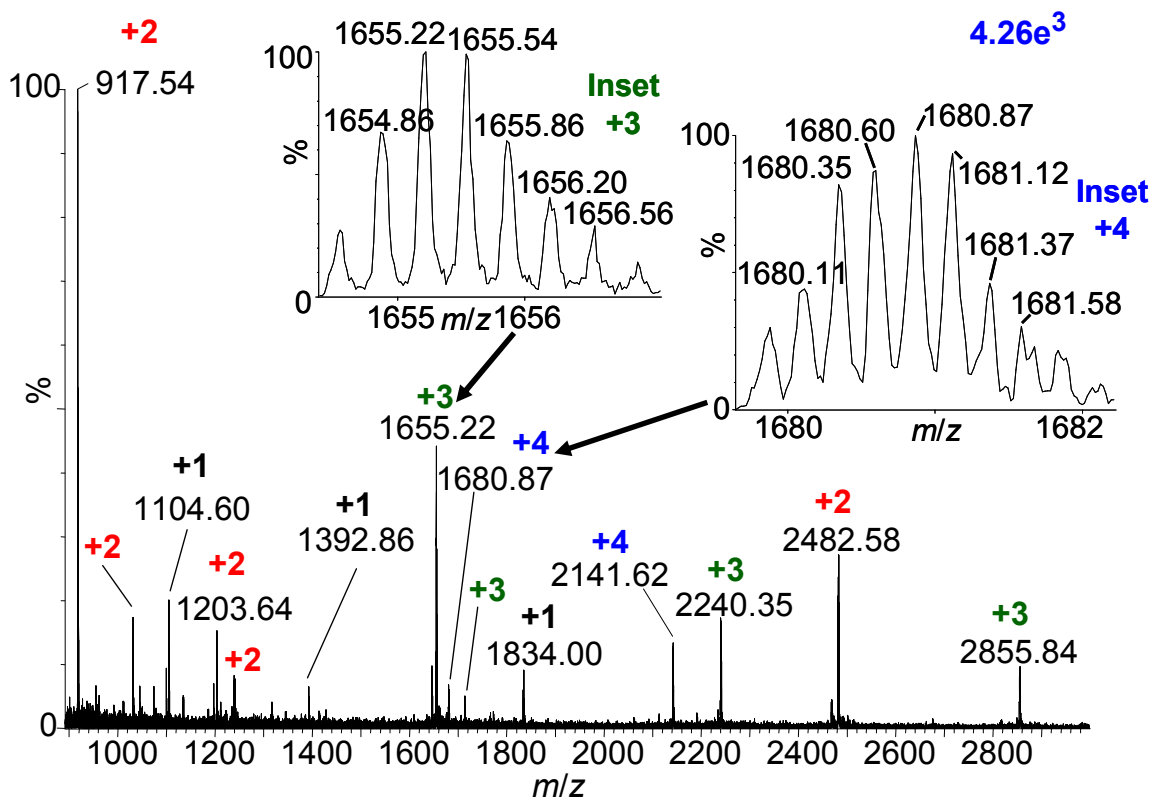

**Figure S5.** LSIV-IMS-MS of delipified mouse brain tissue spotted with 2-NPG matrix shown in **Figure 2A**. Shown here is the total mass spectrum of the multiply charged peptide and protein ions with the large molecular weight detected, an ~8.6 kDa protein ( $m/z$  2855.84) with insets of the isotopic distributions of higher charge states: +3 ( $m/z$  1655.22) and +4 ( $m/z$  1680.87) ions. Data acquired using 'LSI settings'<sup>39,42</sup> on a commercial intermediate pressure MALDI source of the SYNAPT G2 mass spectrometer.

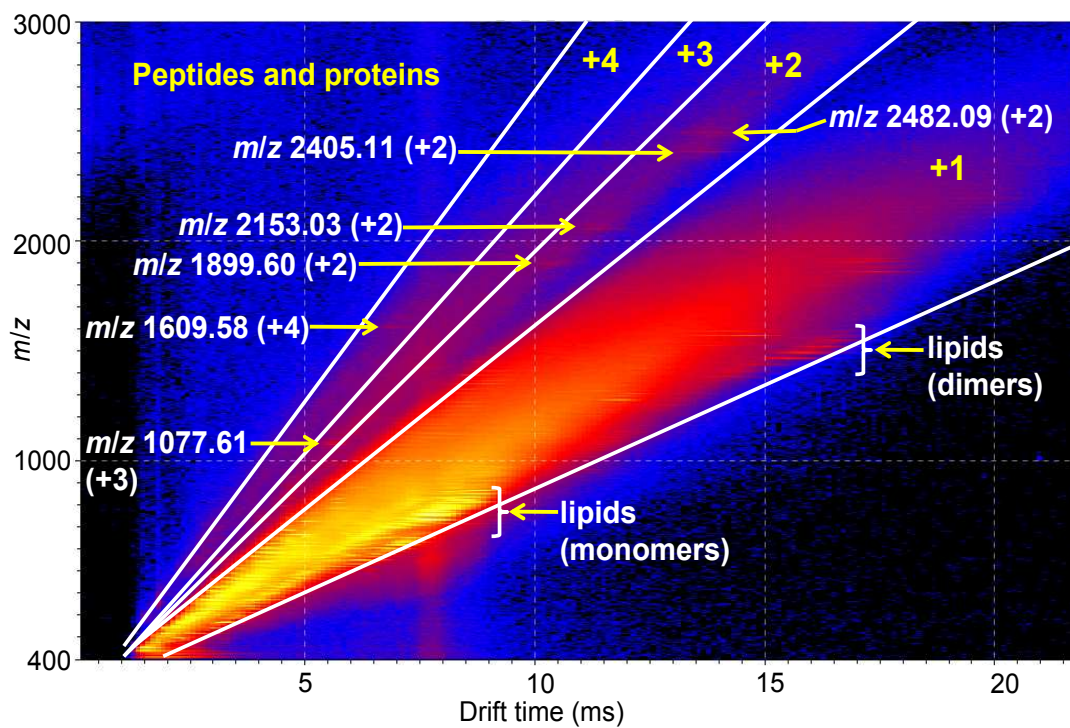

**Figure S6.** LSIV-IMS-MS two-dimensional plot of drift time vs.  $m/z$  of delipified mouse brain tissue mounted on CHCA precoated glass plate spray coated with binary matrix mixture of 90% 2,5-DHAP and 10% 2-NPG and acquired using 'LSI settings'<sup>39,42</sup> on a commercial intermediate pressure MALDI source of SYNAPT G2 mass spectrometer.
